# Supplementary material for: Development of the VISAGE enhanced tool and statistical models for epigenetic age estimation in blood, buccal cells and bones
Source: Aging (Albany NY). 2021 Mar 11;13(5):6459–84. doi: 10.18632/aging.202783 (PMC7993733; doi:10.18632/aging.202783)
Supplement: Supplementary Table 1 [file aging-13-202783-s003.xls]

## Sheet: Table S1
Supplementary Table 1. Characteristics of all the CpG sites analysed in the study and the results of univariate association testing for age and CpG sites analysed in training sets for blood (N=112), buccal cells (N=112) and bones (N=112).
Locus	CpG location in custom reference	Internal CpG name	Strand analysed	GRCh38 Chr:position (reported according to the analysed strand)	CpG_ID	Inclusion in the models				Blood				Buccal cells				Bones				References
						Zbieć-Piekarska et al., 2015	Woźniak&Heidegger et al., 2020			Standardized Coefficient β	t	P-value	R2	Standardized Coefficient β	t	P-value	R2	Standardized Coefficient β	t	P-value	R2
						Blood	Blood	Buccal cells	Bones
MIR29B2CHG	366	C3	+	chr1:207823672	–			Yes		-0.894	-20.946	3.457e-40	0.8	-0.759	-12.243	2.89e-22	0.577	-0.16	-1.704	0.091	0.026	[1,2,3,4,5]
MIR29B2CHG	369	C2	+	chr1:207823675	cg10501210					-0.884	-19.808	4.502e-38	0.781	-0.756	-12.129	5.238e-22	0.572	-0.137	-1.45	0.15	0.019	[1,2,3,4,5]
MIR29B2CHG	375	C1	+	chr1:207823681	–	Yes	Yes			-0.898	-21.431	4.569e-41	0.807	-0.545	-6.822	5.108e-10	0.297	-0.24	-2.591	0.011	0.058	[1,2,3,4,5,6]
EDARADD	302	C2	-	chr1:236394371	–					-0.722	-10.95	2.565e-19	0.522	-0.845	-16.577	1.101e-31	0.714	-0.22	-2.362	0.02	0.048	[5,7]
EDARADD	314	C1	-	chr1:236394383	cg09809672			Yes		-0.85	-16.912	2.247e-32	0.722	-0.859	-17.599	9.09e-34	0.738	-0.321	-3.55	0.0005672	0.103	[5,8,9,10,11,12]
FHL2	334	C1	+	chr2:105399282	cg06639320		Yes			0.957	34.523	7.503e-61	0.916	0.522	6.415	3.647e-09	0.272	0.8	13.986	3.692e-26	0.64	[1,2,3,4,5,9,12,13]
FHL2	340	C2	+	chr2:105399288	–	Yes				0.947	31.039	3.075e-56	0.898	0.505	6.142	1.324e-08	0.255	0.773	12.781	1.763e-23	0.598	[1,2,3,4,5]
FHL2	343	C3	+	chr2:105399291	–					0.952	32.533	2.886e-58	0.906	0.504	6.114	1.515e-08	0.254	0.77	12.666	3.2e-23	0.593	[1,2,3,4,5]
FHL2	349	C4	+	chr2:105399297	–					0.924	25.258	1.338e-47	0.853	0.453	5.329	5.301e-07	0.205	0.786	13.326	1.066e-24	0.617	[1,2,3,4,5]
FHL2	352	C5	+	chr2:105399300	–					0.955	33.809	6.131e-60	0.912	0.512	6.253	7.863e-09	0.262	0.802	14.079	2.307e-26	0.643	[1,2,3,4,5]
FHL2	362	C6	+	chr2:105399310	cg22454769					0.946	30.58	1.337e-55	0.895	0.512	6.255	7.783e-09	0.262	0.793	13.664	1.894e-25	0.629	[1,2,3,4,5]
FHL2	366	C7	+	chr2:105399314	cg24079702					0.905	22.27	1.464e-42	0.818	0.49	5.896	4.158e-08	0.24	0.839	16.202	6.591e-31	0.705	[1,2,3,4,5]
FHL2	368	C8	+	chr2:105399316	–					0.897	21.308	7.62e-41	0.805	0.532	6.593	1.549e-09	0.283	0.692	10.04	3.154e-17	0.478	[1,2,3,4,5]
FHL2	375	C9	+	chr2: 105399323	–					0.905	22.255	1.555e-42	0.818	0.467	5.538	2.109e-07	0.218	0.575	7.378	3.233e-11	0.331	[1,2,3,4,5]
FHL2	379	C10	+	chr2: 105399327	–					0.839	16.194	6.854e-31	0.704	0.484	5.799	6.477e-08	0.234	0.596	7.792	3.984e-12	0.356	[1,2,3,4,5]
TRIM59	333	C1	+	chr3:160450172	–					0.866	18.184	6.21e-35	0.75	0.922	24.965	3.998e-47	0.85	0.769	12.612	4.241e-23	0.591	[1,2,3,4,5]
TRIM59	335	C2	+	chr3:160450174	–					0.874	18.88	2.683e-36	0.764	0.903	22	4.382e-42	0.815	0.768	12.572	5.206e-23	0.59	[1,2,3,4,5]
TRIM59	340	C3	+	chr3:160450179	–					0.908	22.747	2.144e-43	0.825	0.896	21.181	1.29e-40	0.803	0.861	17.733	4.899e-34	0.741	[1,2,3,4,5]
TRIM59	345	C4	+	chr3:160450184	–					0.91	22.975	8.661e-44	0.828	0.923	25.238	1.446e-47	0.853	0.803	14.14	1.699e-26	0.645	[1,2,3,4,5]
TRIM59	350	C5	+	chr3:160450189	cg07553761					0.942	29.302	8.811e-54	0.886	0.909	22.87	1.314e-43	0.826	0.808	14.407	4.431e-27	0.654	[1,2,3,4,5]
TRIM59	353	C6	+	chr3:160450192	–					0.927	25.876	1.374e-48	0.859	0.914	23.564	8.529e-45	0.835	0.833	15.761	5.537e-30	0.693	[1,2,3,4,5]
TRIM59	360	C7	+	chr3:160450199	–	Yes				0.919	24.503	2.289e-46	0.845	0.895	21.025	2.487e-40	0.801	0.848	16.78	4.2e-32	0.719	[1,2,3,4,5]
TRIM59	363	C8	+	chr3:160450202	–		Yes			0.864	18.027	1.271e-34	0.747	0.884	19.784	5.006e-38	0.781	0.859	17.607	8.743e-34	0.738	[1,2,3,4,5]
ELOVL2	429	C9	+	chr6:11044628	–					0.963	37.706	9.724e-65	0.928	0.923	25.096	2.456e-47	0.851	0.794	13.705	1.534e-25	0.631	[3,8,10]
ELOVL2*	429*	C9*	+	chr6:11044628*	–			Yes*		N/A	N/A	N/A	N/A	0.923	25.242	1.421e-47	0.853	N/A	N/A	N/A	N/A	[8]
ELOVL2	432	C8	+	chr6:11044631	–					0.937	28.161	4.181e-52	0.878	0.914	23.553	8.907e-45	0.835	0.681	9.759	1.398e-16	0.464	[1,3]
ELOVL2	435	C7	+	chr6:11044634	–	Yes			Yes	0.941	29.298	8.912e-54	0.886	0.865	18.056	1.111e-34	0.748	0.785	13.297	1.236e-24	0.616	[1,2,3,4,5,8,10,14]
ELOVL2*	435*	C7*	+	chr6:11044634*	–		Yes*			0.976	47.167	8.2e-75	0.953	N/A	N/A	N/A	N/A	N/A	N/A	N/A	N/A	[8]
ELOVL2	441	C6	+	chr6:11044640	–					0.957	34.472	8.711e-61	0.915	0.894	20.902	4.171e-40	0.799	0.682	9.778	1.265e-16	0.465	[1,2,3,4,5,8,14]
ELOVL2	443	C5	+	chr6:11044642	–					0.945	30.313	3.167e-55	0.893	0.914	23.563	8.567e-45	0.835	0.773	12.779	1.779e-23	0.598	[1,2,3,4,5,14]
ELOVL2	445	C4	+	chr6:11044644	cg16867657					0.962	37.076	5.421e-64	0.926	0.898	21.453	4.169e-41	0.807	0.781	13.118	3.091e-24	0.61	[1,2,3,4,5,14,15,16]
ELOVL2	448	C3	+	chr6:11044647	–					0.945	30.338	2.926e-55	0.893	0.842	16.378	2.83e-31	0.709	0.75	11.885	1.877e-21	0.562	[1,2,3,4,5,14]
ELOVL2	456	C2	+	chr6:11044655	cg24724428				Yes	0.961	36.445	3.111e-63	0.924	0.863	17.891	2.371e-34	0.744	0.859	17.492	2.021e-33	0.737	[1,2,3,4,5,8,10,14]
ELOVL2	462	C1	+	chr6:11044661	cg21572722					0.95	31.743	3.337e-57	0.902	0.879	19.338	3.524e-37	0.773	0.774	12.75	2.428e-23	0.599	[1,2,3,4,5,9,10,14,15]
KLF14	349	C1	+	chr7:130734355	cg14361627	Yes		Yes		0.836	15.995	1.783e-30	0.699	0.888	20.305	5.276e-39	0.789	0.706	10.453	3.556e-18	0.498	[1,2,3,4,5,12]
KLF14	351	C2	+	chr7:130734357	–					0.808	14.381	5.053e-27	0.653	0.86	17.659	6.87e-34	0.739	0.722	10.956	2.492e-19	0.522	[1,2,3,4,5]
KLF14	366	C3	+	chr7:130734372	–				Yes	0.844	16.489	1.671e-31	0.712	0.876	19.068	1.163e-36	0.768	0.857	17.466	1.68e-33	0.735	[1,2,3,4,5]
KLF14	369	C4	+	chr7:130734375	–		Yes			0.81	14.479	3.085e-27	0.656	0.877	19.1	1.01e-36	0.768	0.734	11.324	3.58e-20	0.538	[1,2,3,4,5,13]
ASPA	727	C1	+	chr17:3476273	cg02228185				Yes	-0.807	-14.336	6.3232e-27	0.651	-0.484	-5.805	6.321e-08	0.234	-0.284	-3.109	0.002	0.081	[5,8,9,11,12,17,18,19]
PDE4C	601	C1	+	chr19:18233079	–					0.736	11.416	2.195e-20	0.542	0.886	19.998	1.976e-38	0.784	0.51	6.222	9.093e-09	0.26	[5,6,9]
PDE4C	604	C2	+	chr19:18233082	–					0.833	15.806	4.457e-30	0.694	0.9	21.662	1.754e-41	0.81	0.67	9.465	6.597e-16	0.449	[5,6,9]
PDE4C	613	C3	+	chr19:18233091	cg17861230					0.715	10.721	8.631e-19	0.511	0.93	26.465	1.621e-49	0.864	0.406	4.664	8.792e-06	0.165	[5,6,8,9,11,17]
PDE4C	627	C4	+	chr19:18233105	–				Yes	0.916	23.967	1.783e-45	0.839	0.947	30.914	9.166e-56	0.898	0.827	15.453	2.492e-29	0.685	[5,6,8,9,17,18,20]
PDE4C	649	C5	+	chr19:18233127	–		Yes	Yes		0.939	28.588	9.722e-53	0.881	0.965	38.396	3.648e-65	0.931	0.703	10.372	5.47e-18	0.494	[5,6,9,20]
PDE4C	653	C6	+	chr19:18233131	cg01481989				Yes	0.937	28.229	3.303e-52	0.879	0.926	25.571	7.273e-48	0.857	0.832	15.716	6.886e-30	0.692	[6,8,9,17,18,20]
PDE4C	655	C7	+	chr19:18233133	–					0.94	28.794	4.838e-53	0.883	0.912	23.123	1.251e-43	0.832	0.804	14.114	2.355e-26	0.646	[6,9,20]
*the results of univariate regression analysis applied for the power transformed DNA methylation data are presented
References:
1. Hannum G, Guinney J, Zhao L, Zhang L, Hughes G, Sadda S, Klotzle B, Bibikova M, Fan JB, Gao Y, Deconde R, Chen M, Rajapakse I, Friend S, Ideker T, Zhang K. (2013) Genome-wide methylation profiles reveal quantitative views of human aging rates. Mol Cell. 2013 Jan 24;49(2):359-367. doi: 10.1016/j.molcel.2012.10.016. Epub 2012 Nov 21. PMID: 23177740; PMCID: PMC3780611.
2. Zbieć-Piekarska R, Spólnicka M, Kupiec T, Parys-Proszek A, Makowska Ż, Pałeczka A, Kucharczyk K, Płoski R, Branicki W. (2015). Development of a forensically useful age prediction method based on DNA methylation analysis. Forensic Sci Int Genet. 2015 Jul;17:173-179. doi: 10.1016/j.fsigen.2015.05.001. Epub 2015 May 5. PMID: 26026729.
3. Cho, S., Jung, S. E., Hong, S. R., Lee, E. H., Lee, J. H., Lee, S. D., & Lee, H. Y. (2017). Independent validation of DNA-based approaches for age prediction in blood. Forensic Sci. Int. Genet., 29, 250–256.
4. Thong Z., Chan X.L.S. ,Tan J.Y.Y., Loo E.S., Syn C.K.C., (2017).Evaluation of DNA methylation-based age prediction on blood, Forensic Sci. Int. Genet. Supplement Series, 6, e249–e251. https://doi.org/10.1016/j.fsigss.2017.09.095
5. Daunay, A., Baudrin, L.G., Deleuze, JF. et al.(2019). Evaluation of six blood-based age prediction models using DNA methylation analysis by pyrosequencing. Sci Rep 9, 8862. https://doi.org/10.1038/s41598-019-45197-w
6. Fleckhaus, Jan & Schneider, Peter M.. (2019). Novel multiplex strategy for DNA methylation-based age prediction from small amounts of DNA via Pyrosequencing. Forensic Science International: Genetics. 44. 102189. 10.1016/j.fsigen.2019.102189.
7. Smeers, I., Decorte, R., Van de Voorde, W., and Bekaert, B. (2018). Evaluation of three statistical prediction models for forensic age prediction based on DNA methylation. Foren. Sci. Int. Genet. 34, 128–133. doi: 10.1016/j.fsigen.2018.02.008
8. Bekaert, B., Kamalandua, A., Zapico, S. C., van de Voorde, W., & Decorte, R. (2015). Improved age determination of blood and teeth samples using a selected set of DNA methylation markers. Epigenetics, 10(10), 922–930. https://doi.org/10.1080/15592294.2015.1080413
9. Freire-Aradas, A., Phillips, C., Mosquera-Miguel, A., Girón-Santamaría, L., Gómez-Tato, A., Cal, M. C. de, Álvarez-Dios, J., Ansede-Bermejo, J., Torres-Español, M., Schneider, P. M., Pośpiech, E., Branicki, W., Carracedo, Á., & Lareu, M. V. (2016). Development of a methylation marker set for forensic age estimation using analysis of public methylation data and the Agena Bioscience EpiTYPER sys…
10. Zubakov, D., Liu, F., Kokmeijer, I., Choi, Y., van Meurs, J. B. J., van IJcken, W. F. J., et al. (2016). Human age estimation from blood using mRNA, DNA methylation, DNA rearrangement, and telomere length. Foren. Sci. Int. Genet. 24, 33–43. doi: 10.1016/j.fsigen.2016.05.014
11. Bocklandt, S., Lin, W., Sehl, M. E., Sánchez, F. J., Sinsheimer, J. S., Horvath, S., & Vilain, E. (2011). Epigenetic predictor of age. PLoS One, 6.
12. Pan C., Yi S., Xiao C., Huang Y., Chen X., Huang D. (2020). The evaluation of seven age-related CpGs for forensic purpose in blood from Chinese Han population, Forensic Sci. Int. Genet., 46, 102251. https://doi.org/10.1016/j.fsigen.2020.102251
13. Jung, S. E., Lim, S. M., Hong, S. R., Lee, E. H., Shin, K. J., & Lee, H. Y. (2019). DNA methylation of the ELOVL2, FHL2, KLF14, C1orf132/MIR29B2C, and TRIM59 genes for age prediction from blood, saliva, and buccal swab samples. Forensic Science International: Genetics, 38, 1–8. https://doi.org/10.1016/j.fsigen.2018.09.010
14. Zbieć-Piekarska R, Spólnicka M, Kupiec T, Makowska Ż, Spas A, Parys-Proszek A, Kucharczyk K, Płoski R, Branicki W (2015). Examination of DNA methylation status of the ELOVL2 marker may be useful for human age prediction in forensic science. Forensic Sci Int Genet. Jan;14:161-7. doi: 10.1016/j.fsigen.2014.10.002. Epub 2014 Oct 14. PMID: 25450787.
15. Park, J. L., Kim, J. H., Seo, E., Bae, D. H., Kim, S. Y., Lee, H. C., et al. (2016). Identification and evaluation of age-correlated DNA methylation markers for forensic use. Forens. Sci. Int. Genet. 23, 64–70. doi: 10.1016/j.fsigen.2016.03.005
16. Slieker, R. C., Relton, C. L., Gaunt, T. R., Slagboom, P. E., & Heijmans, B. T. (2018). Age-related DNA methylation changes are tissue-specific with ELOVL2 promoter methylation as exception. Epigenetics Chromatin, 11, 25.
17. Weidner, C. I., Lin, Q., Koch, C. M., Eisele, L., Beier, F., Ziegler, P., Bauerschlag, D. O., Jöckel, K. H., Erbel, R., Mühleisen, T. W., Zenke, M., Brümmendorf, T. H., & Wagner, W. (2014). Aging of blood can be tracked by DNA methylation changes at just three CpG sites. Genome Biology, 15(2), R24. https://doi.org/10.1186/gb-2014-15-2-r24
18. Eipel, M., Mayer, F., Arent, T., Ferreira, M. R. P., Birkhofer, C., Gerstenmaier, U., Costa, I. G., Ritz-Timme, S., & Wagner, W. (2016). Epigenetic age predictions based on buccal swabs are more precise in combination with cell type-specific DNA methylation signatures. Aging, 8(5), 1034–1048. https://doi.org/10.18632/aging.100972
19. Huang, J. Yan, J. Hou, X. Fu, L. Li, Y. Hou (2015). Developing a DNA methylation assay for human age prediction in blood and bloodstain, Forensic Sci. Int. Genet. 17 129–136. https://doi.org/10.1016/j.fsigen.2015.05.007
20. Xu, C., Qu, H., Wang, G., Xie, B., Shi, Y., Yang, Y., et al. (2015). A novel strategy for forensic age prediction by DNA methylation and support vector regression model. Sci. Rep. 5:17788.
