# Supplementary material for: Development of the VISAGE enhanced tool and statistical models for epigenetic age estimation in blood, buccal cells and bones
Source: Aging (Albany NY). 2021 Mar 11;13(5):6459–84. doi: 10.18632/aging.202783 (PMC7993733; doi:10.18632/aging.202783)
Supplement: Supplementary Table 3 [file aging-13-202783-s005.xls]

## Sheet: Table S3
Supplementary Table 3. Primer sequences tested for multiplex PCR optimizations.
Internal primer name	Marker	Primer sequence*		Length [nts]	Amplicon size [bp]	Amplicon position (GRCh38)	Strand	CpG in primer seq. [N]	Design	included in final multiplex
W_PDE4C_F	PDE4C	forward:	AGGTTTGTAGTAGGTTGAG	19	156	19:18233005-18233160	-	0	Weidner et al. (2014)	no
W_PDE4C_R		reverse:	AACTCAAATCCCTCTC	16			-	0	Weidner et al. (2014)
PDE4C_F.1	PDE4C	forward:	ATTTATAGTTTGTAGGAGGAAA	22	288	19:18232944:18233231	+	1	MethPrimer 2.0	no
PDE4C_R.1		reverse:	AATCCTACTCCCTACTATCCCAAAC	25			+	0	MethPrimer 2.0
PDE4C_F_deg	PDE4C	forward:	ATTTATYGTTTGTAGGAGGAAA	22	288	19:18232944:18233231	+	1	MethPrimer 2.0	no
PDE4C_R.1		reverse:	AATCCTACTCCCTACTATCCCAAAC	25			+	0	MethPrimer 2.0
PDE4C_F.2	PDE4C	forward:	TTGTAGGAGGAAAAGGGTTAG	21	214	19:18232953-18233167	+	1	MethPrimer 2.0	yes
PDE4C_R.2		reverse:	AAAACAAAAACTTACAACAAATTAAA	26			+	0	MethPrimer 2.0
PDE4C_F.2_deg	PDE4C	forward:	TTGTAGGAGGAAAYGGGTTAG	21	214	19:18232953-18233167	+	1	MethPrimer 2.0	no
PDE4C_R.2		reverse:	AAAACAAAAACTTACAACAAATTAAA	26			+	0	MethPrimer 2.0
PDE4C_F.3_deg	PDE4C	forward:	GGTTATTTATYGTTTGTAGGAG	22	276	19:18232940-18233216	+	1	PrimerSuite	no
PDE4C_R.3		reverse:	ATCCCAAACCCCTTTCTCT	19			+	0	PrimerSuite
Z_MIR29B2CHG_F	MIR29B2CHG	forward:	GTAAATATATAAGTGGGGGAAGAAGGG	27	146	1:207823607-207823750	+	1	Zbieć-Piekarska et al. (2015)	no
Z_MIR29B2CHG_R		reverse:	TTAATAAAACCAAATTCTAAAACATTC	27			+	0	Zbieć-Piekarska et al. (2015)
Z_MIR29B2CHG_F_deg	MIR29B2CHG	forward:	GTAAATATATAYGTGGGGGAAGAAGGG	27	146	1:207823607-207823750	+	1	Zbieć-Piekarska et al. (2015)	yes
Z_MIR29B2CHG_R		reverse:	TTAATAAAACCAAATTCTAAAACATTC	27			+	0	Zbieć-Piekarska et al. (2015)
W_ASPA_F	ASPA	forward:	ATTATTTGGTGAAATGATT	19	151	17:3476147-3476297	+	0	Weidner et al. (2014)	no
W_ASPA_R		reverse:	CAACCCTATTCTCTAAATCTC	21			+	0	Weidner et al. (2014)
ASPA_F.2	ASPA	forward:	TTTTGGAGGAATTTATGGGAA	21	108	17:3476207:3476314	+	0	MethPrimer 2.0	yes
ASPA_R.2		reverse:	ATAAATAATTTTACCTCCAACCCTA	25			+	0	MethPrimer 2.0
B_EDARADD_F	EDARADD	forward:	TTGGTGATTAGGAGTTTTAGTGTTTT	26	193	1:236394309-236394501	-	0	Bekaert et al. (2015)	yes
B_EDARADD_R		reverse:	CCACCTACAAATTCCCCAAA	20			-	0	Bekaert et al. (2015)
*CpGs in primer sequence are underlined and highlighted in bold
