# Supplementary material for: Development of the VISAGE enhanced tool and statistical models for epigenetic age estimation in blood, buccal cells and bones
Source: Aging (Albany NY). 2021 Mar 11;13(5):6459–84. doi: 10.18632/aging.202783 (PMC7993733; doi:10.18632/aging.202783)
Supplement: Supplementary Table 5 [file aging-13-202783-s007.xls]

## Sheet: Table S5
Supplementary Table 5. Sequences used for fasta file preparation (GRCh38).
>KLF14
GTCCAGGCACGCCACGGCGGCCGACATGCTGGGACCGCCCGGCCGCCGGCGAGCGCCGTCCGAACGCGGCCGGCCGCGGGCGACGGAGTTCCCGGGAGCGTCCGTCCCGCAGCCTCGGAGCGAGAAGCAGGAGGCCGGGTGCTCGCCGCCTGCCGCCTGCTGCCGCCGCCGCCGCCGCAGCCGCCGCTGCCGCCGCCGCCCGCGCGGAGCCCGCCCCGCCTGACGCGCCCCTGACGCACCGGAGCCCGCGGGGGCGGCAGAGACCCGCCCCGGCCCGCAGGACACCCCCTCGGAACGCGCGGCCCCCGGCTAAGTCATGTTTAACAGCCTCAGAAATTATCTTGTCTCCGCGTTCTTTCTTCTGCCGGCGAGCCAGGTAATGGTAACAGAGCGAAACTC…
>C1orf132/MIR29B2CHG
TACCTTCCACATAAGACCTGCACGGACAGACAGATGGACGCTGACACCCAAACAACTTGGAGAACCAGTCTGTCTGTCCACTAGAAGGAAATAGGGTAAAAGCTGGGAGGTCAGGTGGGAAGCAGGGGATGGTTCACTCCTCTCACCTCTACCCTGGTCAGGCTTGAGCAGCTGACACTAGGGAAAAGAAATTAAAGTGGGAAAAAACCCTCCCTCAGAGAAATAAATAGCAAAAATCGAGAAAGAAGGTGAGAAAGACAGAGCACCCACATACACAGAGACAGCGCCCCTGATCCCAGCAAATACATACGTGGGGGAAGAAGGGGGTTACGCCATCAAGTCCTGAAGCCCGTCGGACCACCCATCGCCGCCTGCGCAGACCCAAATCTTGGTCCCGCC…
>TRIM59
AGACCGGGCGGGGCCTCGCGGAGCCTCGCAGCGCAGGCGCAGTCTGCAGGCAACATTCAACTGCAAGGCATCGGCCAATGGGAACTATTGCTGGGCTCGTTCGAAAGTAAACGGTGGACGGCGCGGCCCGAGGCAGGTGGCGGGAGTCAGTTTAAGGCTGGCGCCCAGCTTTCCGCGCCTGCGTGCTAGGCGCAGGCCGCCTCTCGGAAGCTTGGCCTCGCAGGAGCGGCTCTCTATCCTGTGGGGAGCTTCGGCCAGTGGGCCTCGTGAGCTGGGGTCCCGCCTGGGGAATCCGCATGGCACCGGTGGTCTGGGGGAGAGGCTGGGCCTGGCGCGGGACGAGGCGAAGCGCCGGTGGCCGACGGCTTCTGAGGAATTATCTTTTACTTGGCGCCACAC…
>FHL2
CAGGGGGTTGGAGGTACTCACGGCACCGCAGCGGGCCGGGGACTCCCGGACGGGGCTGGAGGGCGCGGGCGGCTGGTGGCTGCGGCTCCGCTGCCGGCCGAGTGGAGCGCTGCGCAGCTCCCGCCCTCGAGAAACCCCGCCGTGTCATTTGACCATATAAGGAGATGCACGCCTCGGCTCGCTGGCACCGGGCGTGGGGCGCGGGGGGCGGGCGCCCCCAGGCCTCGCGGTTGCCGTGCCCCCGCCCCGGGCTGCGGCGGTCCCGGCCCGTACCCTTTGTTTGCCAGGGCTCCTTTCTTCGTGCCCTCCGGGTCTTGGGAGCACAGTAGTTATCGGGAGCGTCGCCTCCGGCGTGGGCTCTCGGGCGCGAGTTTCGGACGAGGCCTGGGCGCGGTGGCA…
>ELOVL2
GTCGGTGGCGGCGCGCGGCCCCACTCACCATGATCCGCAGCGGCTGTGGCGCGGCGACCCGGGCGGGCGGCGATGCGCTGTCCAGGGTAGCCGGGTCCCTCTGCCCGGCGCTATCTCGGCGCCCGCGCCGGTTACCCCCACCCACACCCACGCCCGGCGCGCGCACACCCGCCCGCGCCTCCCCGCCCCCTCGGGCTCGCGCCGCCGCCGCGCGGCGCTCCGAGCCTCGGGGCCGTTTCGTCCCCGCCCCCTCTCCCACAGGGGCCTCGCCGGCCGCCGCGCCAGGAGGGCGCGCGGGGGAGGGGCGCAGGGCAAGTGAGGCGGCGCCCCCCGCCCCTGCGGCCTCGCGCGCCCCCTCCTGGGCGACCGACCTCGCCCTCGCGTCCGCGGCGTCCCCTG…
>EDARADD
CATGAATTACATTTCAGAGTTTCAAAAAGCAAACCAGCTTTATAGCAATGCTTGAGGTTGGGCTGCTAACAAGCTCACTCAACTAGTGTTTCCTGACGGCCAACGTCAGAATAATTCCATCTCCATGAGAAGTACAGAAAGAACCACAAACCAAACCTCCAAATTGATTCTAAGATAAAATACCCTTAAAAAAAATTTCCCTTCCTATCCGAAGGCAGACCAAGAGGAAGTTTATCCTCCCACCTACAAATTCCCCAGAGAGCTTTCATCTAGAAGGTTTGACTCTGGCCAGACAACCAGCGAGCATCTTCTCGCAATCTGTTGCTTCTTCCATGGCAAACTCCAGAGAATTAAGAAGCCAAACTCAACATCGCCATGGGCCTCAGGACGACTAAACAG…
>PDE4C
CCCCACAGGCCTGCGGACATTCCACAACCCCGAAAACCTTCGGACCCCCAGCTATGTTAGCACAAGGACAGTCACACTCAGCCACATACCTACAGGCACCACAAGGGGAGACACACAGGCACACCCACAACTACCTGGGACACATGGAATCATACCCAAGCATGAACGTACAGGAGCACCCCAAACACATCTGGTCACCCCAGTCTCACGCGCGCGCGCGCACACACACACACACTCTTTCAGTCCCAACCGCACGTGGGCACACCCGGTCACACAGACCCACAAGCCATGATGACACCAGCACCCTCAGCTCCACCCCTACGTAGAAATAGCTTTTTCCTTCCAGGCGCCAGCCTCAACCAAGCAGCAGAGACCCCCGCCCCCTGGAGAAGCAAGGAC…
>ASPA
CTGATTGTGAAAAAGCATTCTGAAAGAATGGGCGCCGGTTCAAGAGGAGGTCTCTGAGGGTCAGCCTTTGGCTGTTTATAGAGGTGAGATTCAAATGCCCTCAGATCATGAAAAGTGCTTGAACTCATTTCAGAGAAGAAATGTTTTGAAATGCCCGTGGAAATACTGAGTGGGCCACTTTTTTATTTTGTGAAATTAGAAACGTATAAACTATTTTTATTATTACAGATAATTGTGAAAGCCTCACTGGATGACATCCTAGCTGAGGAAAAGAATGGAATTTTTGTATTAGTATGAAATGCTAATTTATTACTGTATTTAGATCTACTGACCATCTGAGGGAGTTAGAAGTTAAAGTAAACAGCTGTATCTCTAGTTGATCTTTGCATATTTTAATCC…
